# Supplementary material for: Genome-Wide Identification of the Early Flowering 4 (ELF4) Gene Family in Cotton and Silent GhELF4-1 and GhEFL3-6 Decreased Cotton Stress Resistance
Source: Front Genet. 2021 Jul 6;12:686852. doi: 10.3389/fgene.2021.686852 (PMC8315153; doi:10.3389/fgene.2021.686852)
Supplement: Supplementary Table 1 — Physicochemical characteristics of ELF4 proteins of A. thaliana, Populus trichocarpa, Glycine max, Theobroma cacao, and Oryza sativa, G. arboreum, G. raimondii, G. hirsutum, and G. barbadense. Including amino acid length, protein isoelectric point, protein molecular weight, hydrophilicity and subcellular location. [file Table_1.XLSX]

## Sheet: Sheet1
Detailed physicochemical characteristics of ELF4 proteins of A. thaliana, Populus trichocarpa, Glycine max, Theobroma cacao, and Oryza.sativa, G. arboreum, G. raimondii, G. hirsutum and G.barbadense. Including amino acid length, protein isoelectric point, protein molecular weight, hydrophilicity and subcellular location。
ID	NAME	Length (AA)	MW (Da)	Isoelectric Point	Subcellular Location	GRAVY
Ga13G2387.1	GaEFL3-4	117	12854.2	6.7265	Nuclear	-0.764103
Ga10G2514.1	GaEFL4-3	116	12899.3	7.0131	Nuclear	-0.642241
Ga10G0048.1	GaELF4-3	105	12040.2	7.5246	Nuclear	-1.0981
Ga10G0047.1	GaELF4-2	108	12299.5	7.5244	Nuclear	-1.13333
Ga08G2888.1	GaEFL3-3	127	13980.5	5.5481	Nuclear	-0.715748
Ga07G0155.1	GaELF3-2	112	12476.8	5.1281	Nuclear	-0.759821
Ga06G2001.1	GaELF4-1	112	12671	6.7249	Nuclear	-0.959821
Ga06G0798.1	GaEFL3-1	121	13031.4	8.549	Nuclear	-0.716529
Ga05G1490.1	GaEFL4-2	114	12564.9	4.8484	Nuclear	-0.660526
Ga05G0937.1	GaPLC4	1209	136817	5.9921	Nuclear	-0.410753
Ga05G0350.1	GaEFL4-1	114	12849.2	5.1342	Nuclear	-0.667544
Gorai.013G225600.1	GrEFL4-5	117	12863.1	6.7265	Nuclear	-0.773504
Gorai.011G287800.1	GrELF4-4	105	12039.3	7.5246	Nuclear	-1.0219
Gorai.011G287700.1	GrELF4-3	108	12371.6	8.6889	Nuclear	-1.17222
Gorai.011G058500.1	GrEFL4-4	116	12908.3	7.2029	Nuclear	-0.639655
Gorai.010G198100.1	GrELF4-2	112	12643.8	5.6071	Nuclear	-0.977679
Gorai.010G087000.1	GrEFL3-2	121	13045.5	9.593	Nuclear	-0.719835
Gorai.009G146600.1	GrEFL4-3	114	12594.9	4.8484	Nuclear	-0.664035
Gorai.009G092100.1	GrEFL1	178	20194.8	4.8024	Nuclear	-0.432022
Gorai.009G034800.1	GrEFL4-2	114	12863.3	5.7168	Nuclear	-0.671053
Gorai.005G153800.1	GrELF4-1	73	8514.23	10.3931	Nuclear	-1.75068
Gorai.004G284700.1	GrEFL4-1	127	13852.4	6.4772	Nuclear	-0.674016
Gorai.001G014800.1	GrEFL3-1	112	12486.7	5.1283	Nuclear	-0.858036
Ghir_D13G021260.1	GhEFL3-9	117	12895.2	6.7265	Nuclear	-0.793162
Ghir_D10G026440.1	GhELF4-5	105	12030.3	7.4692	Nuclear	-1.02476
Ghir_D10G005880.1	GhEFL4-5	116	12908.3	7.2029	Nuclear	-0.639655
Ghir_D08G026720.1	GhEFL3-8	127	13864.4	6.4772	Nuclear	-0.673228
Ghir_D07G001530.1	GhEFL3-7	112	12473.7	5.1283	Nuclear	-0.833036
Ghir_D06G018560.1	GhELF4-4	112	12615.8	5.0845	Nuclear	-0.877679
Ghir_D06G008170.1	GhEFL3-6	121	13017.4	8.549	Nuclear	-0.719008
Ghir_D05G014280.1	GhEFL4-4	114	12594.9	4.8484	Nuclear	-0.664035
Ghir_D05G009060.1	GhEFL1-2	134	15102.9	6.9611	Nuclear	-0.857463
Ghir_D05G003540.1	GhEFL4-3	114	12863.3	5.7168	Nuclear	-0.671053
Ghir_A13G020430.1	GhEFL3-5	117	12854.2	6.7265	Nuclear	-0.764103
Ghir_A10G024010.1	GhELF4-3	105	12066.3	7.5246	Nuclear	-1.04762
Ghir_A10G024000.1	GhELF4-2	108	12327.5	8.6726	Nuclear	-1.14259
Ghir_A10G005100.1	GhEFL4-2	114	12755.2	7.0131	Nuclear	-0.642982
Ghir_A08G025870.1	GhEFL3-4	127	13962.4	5.5481	Nuclear	-0.695276
Ghir_A07G001510.1	GhEFL3-3	112	12462.8	5.1281	Nuclear	-0.779464
Ghir_A06G017580.1	GhELF4-1	112	12671	6.7249	Nuclear	-0.959821
Ghir_A06G007940.1	GhEFL3-2	121	13058.4	8.549	Nuclear	-0.738843
Ghir_A05G014490.1	GhEFL4-1	114	12564.9	4.8484	Nuclear	-0.660526
Ghir_A05G009070.1	GhEFL1-1	124	13920.6	10.0438	Nuclear	-0.912097
Ghir_A05G003410.1	GhEFL3-1	114	12897.3	5.7168	Nuclear	-0.679825
Gbar_D13G021260.1	GbEFL3-9	117	12895.2	6.7265	Nuclear	-0.793162
Gbar_D10G026240.1	GbELF4-6	105	12044.3	7.4692	Nuclear	-1.00381
Gbar_D10G026230.1	GbELF4-5	108	12343.5	8.6726	Nuclear	-1.16667
Gbar_D10G005600.1	GbEFL4-5	116	12908.3	7.2029	Nuclear	-0.639655
Gbar_D08G027450.1	GbEFL3-8	141	15335.9	5.5481	Nuclear	-0.602837
Gbar_D07G001520.1	GbEFL3-7	112	12486.7	5.1283	Nuclear	-0.858036
Gbar_D06G018320.1	GbELF4-4	112	12616.8	5.0845	Nuclear	-0.949107
Gbar_D06G008230.1	GbEFL3-6	121	12971.3	8.549	Nuclear	-0.746281
Gbar_D05G014310.1	GbEFL4-4	114	12594.9	4.8484	Nuclear	-0.664035
Gbar_D05G009010.1	GbEFL1-2	134	15102.9	6.9611	Nuclear	-0.857463
Gbar_D05G003390.1	GbEFL4-3	114	12863.3	5.7168	Nuclear	-0.671053
Gbar_A13G020880.1	GbEFL3-5	117	12854.2	6.7265	Nuclear	-0.764103
Gbar_A10G025180.1	GbELF4-3	105	12066.3	7.5246	Nuclear	-1.04762
Gbar_A10G025170.1	GbELF4-2	108	12327.5	8.6726	Nuclear	-1.14259
Gbar_A10G005720.1	GbEFL4-2	116	12899.3	7.0131	Nuclear	-0.642241
Gbar_A08G026770.1	GbEFL3-4	127	13962.4	5.5481	Nuclear	-0.695276
Gbar_A07G001520.1	GbEFL3-3	112	12462.8	5.1281	Nuclear	-0.779464
Gbar_A06G017670.1	GbELF4-1	112	12674	6.2185	Nuclear	-0.908036
Gbar_A06G007910.1	GbEFL3-2	121	13058.4	8.549	Nuclear	-0.738843
Gbar_A05G042220.1	GbEFL3-1	114	12897.3	5.7168	Nuclear	-0.679825
Gbar_A05G013880.1	GbEFL4-1	114	12564.9	4.8484	Nuclear	-0.660526
Gbar_A05G008530.1	GbEFL1-1	129	14382.2	9.0829	Nuclear	-0.802326
Thecc.10G016800.1.p	Thecc.ELF4-4	114	12925.3	7.4697	Nuclear	-0.912281
Thecc.09G301600.1.p	Thecc.ELF4-3	77	8634.31	4.4733	Nuclear	-1.23247
Thecc.09G080100.1.p	Thecc.ELF4-2	114	12497.8	7.3193	Nuclear	-0.669298
Thecc.06G119000.1.p	Thecc.ELF4-1	114	12594	7.0142	Nuclear	-0.600877
Potri.019G131700.1.p	Potri.ELF4-7	158	17923.3	9.6133	Nuclear	-0.66962
Potri.009G046400.2.p	Potri.ELF4-6	124	13885.6	9.8911	Nuclear	-0.903226
Potri.008G068200.1.p	Potri.ELF4-5	122	13674.8	5.6088	Nuclear	-0.913934
Potri.006G143800.1.p	Potri.ELF4-4	114	12573.9	7.2037	Nuclear	-0.740351
Potri.003G063900.1.p	Potri.ELF4-3	114	12703.2	7.0146	Nuclear	-0.676316
Potri.001G251600.4.p	Potri.ELF4-2	129	14309.8	5.2579	Nuclear	-0.88062
Potri.001G170100.1.p	Potri.ELF4-1	114	12720.2	7.0146	Nuclear	-0.692982
LOC_Os11g40610.1	OsELF4-4	117	12781.1	8.7282	Nuclear	-0.661538
LOC_Os08g27870.1	OsELF4-3	197	21070.2	4.7491	Nuclear	-0.417259
LOC_Os08g27860.1	OsELF4-2	144	14787.1	5.2082	Nuclear	-0.401389
LOC_Os03g29680.1	OsELF4-1	114	12215.6	6.6427	Nuclear	-0.288596
Glyma.18G027500.1.p	Glyma.ELF4-9	137	15437.9	8.133	Nuclear	-1.10146
Glyma.17G050800.1.p	Glyma.ELF4-1	114	12642.1	8.64	Nuclear	-0.659649
Glyma.16G006700.1.p	Glyma.ELF4-8	114	12779.2	7.0151	Nuclear	-0.725439
Glyma.15G176300.1.p	Glyma.ELF4-7	112	12526	8.5681	Nuclear	-0.726786
Glyma.14G193700.2.p	Glyma.ELF4-6	150	17052.3	4.0718	Nuclear	-0.935333
Glyma.13G108600.1.p	Glyma.ELF4-5	114	12627.1	8.64	Nuclear	-0.595614
Glyma.11G229700.1.p	Glyma.ELF4-4	123	14115.5	8.133	Nuclear	-1.11301
Glyma.09G067300.1.p	Glyma.ELF4-3	112	12626.1	7.3183	Nuclear	-0.732143
Glyma.07G037300.1.p	Glyma.ELF4-2	114	12779.2	7.0151	Nuclear	-0.725439
AT2G40080.1	ATELF4	111	12375.6	8.6976	Nuclear	-1.04595
AT2G29950.1	ATELF4-1	125	14080.4	4.6092	Nuclear	-0.8728
AT2G06255.1	ATELF4-3	109	12310.8	7.3205	Nuclear	-0.711927
AT1G72630.1	ATELF4-2	119	13408.8	6.728	Nuclear	-0.857983
AT1G17455.1	ATELF4-4	114	12663	6.7275	Nuclear	-0.814035
